# Supplementary material
Source: ML conference proceedings conference paper supplement (https://proceedings.neurips.cc/paper_files/paper/2023/hash/fa5b423e24b442180bcd4e13ae75a27f-Abstract.html)
Supplement: Supplementary file 1 [file fa5b423e24b442180bcd4e13ae75a27f-Supplemental-Conference.pdf]

---

# Supplementary Material for Bridging the Domain Gap: Self-Supervised 3D Scene Understanding with Foundation Models

---

Anonymous Author(s)

Affiliation

Address

email

## 1 Baseline: Point-MAE

**Point Patches Generation and Masking:** Following Point-BERT [12], the Point-MAE divides the input point cloud into  $n$  irregular point patches (may overlap) via Farthest Point Sampling (FPS) and K-Nearest Neighborhood (KNN) algorithm. The masking strategy is set to random and the mask ratio  $m$  is 60 %.

**Embedding:** To embed each masked point patch, the Point-MAE method substitutes it with a mask token that is learnable and weighted-shared. Meanwhile, for unmasked point patches (i.e., those that are visible), Point-MAE employs a lightweight PointNet [8] to extract features from the point patches. The visible point patches  $P^v$  are hence embedded into visible tokens  $T^v$ :

$$T^v = \text{PointNet}(P^v) \quad (1)$$

**Backbone:** The backbone of Point-MAE is entirely based on standard Transformers, with an asymmetric encoder-decoder. The encoder takes visible tokens  $T^v$  as input to generate encoded tokens  $T^e$ . In addition, Point-MAE incorporates positional embeddings into each Transformer block, thereby adding location-based information. The decoder is similar to the encoder but contains fewer Transformer blocks. The Point-MAE pads encoded tokens  $T^e$  with learnable mask tokens  $T^m$  and sends them to the decoder. A complete set of positional embeddings is added to every Transformer block in the decoder part to provide location information to all the tokens. The outputs of the decoder are fed to a simple fully connected (FC) layer to reconstruct the masked 3D coordinates. The encoder-decoder structure is formulated as:

$$T^e = \text{Encoder}(T^v) \quad (2)$$

$$H^m = \text{Decoder}(\text{concat}(T^e, T^m)) \quad (3)$$

The projection head is formulated as:

$$P^{pre} = \text{Reshape}(FC(H^m)) \quad (4)$$

**Reconstruction Target:** Point-MAE’s reconstruction task aims to restore the coordinates of the points in each masked point patch. To evaluate the accuracy of the predicted coordinates of the masked patches, Point-MAE computes the reconstruction loss by  $l_2$  Chamfer Distance [4], which is formulated as:

$$\mathcal{L}_{MAE} = \frac{1}{M_{mask}} \text{Chamfer}(P^{pre}, P^{mask}) \quad (5)$$

where  $P_{mask}$  represents the ground truth of masked points.

| Distillation Metric      | ScanNetV2   |             | S3DIS       |             |
|--------------------------|-------------|-------------|-------------|-------------|
|                          | $AP_{25}$   | $AP_{50}$   | $mIoU$      | $mAcc$      |
| InfoNCE                  | 65.8        | 45.0        | 70.7        | 76.8        |
| Cosine Similarity        | 65.6        | 44.4        | 70.3        | 76.3        |
| $\mathcal{L}_2$ Distance | 65.2        | 44.9        | 69.7        | 75.9        |
| Smooth $\mathcal{L}_1$   | <b>66.3</b> | <b>45.5</b> | <b>71.1</b> | <b>77.5</b> |

Table 1: Ablation study on the Distillation metric for 3D object detection and semantic segmentation tasks.

## 2 Implementation Details of Methodology

**Object Detection on ScanNet.** For the 3D object detection task, We fine-tune our method on the ScanNetV2 [3] dataset based on GroupFree3D [5] and 3DETR [6]. This dataset includes 1,513 indoor scenes with 18 categories of axis-aligned 3D bounding boxes, where 1,201 are for training and 312 are for validation. We utilized the same encoder architecture in the pre-trained stage and the same decoder as in 3DETR and GroupFree3D. For the encoder, we randomly sample 40K points and divided them into 512 patches with 128 points. We train our method the 3DETR for 1,080 epochs with a learning rate of  $1e-5$ . We train our method the GroupFree3D for 1,080 epochs with a learning rate of  $6e-5$  and a batch size of 8.

**Object Detection on SUN RGB-D.** We fine-tune our method on the SUN RGB-D [11] dataset based on GroupFree3D [5] and 3DETR [6]. SUN RGB-D contains more than 10,000 indoor scenes while 5285 for training and 5050 for validation. We utilized the same encoder architecture in the pre-trained stage and the same decoder as in 3DETR and GroupFree3D. For the encoder, we randomly sample 40K points and divided them into 512 patches with 128 points. We train our method the 3DETR for 1,080 epochs with a learning rate of  $1e-5$ . We train our method the GroupFree3D for 1,080 epochs with a learning rate of  $3e-5$  and a batch size of 8.

**Semantic Segmentation on S3DIS.** For the 3D semantic segmentation task on the S3DIS dataset [1], we followed standard practice and reserved area 5 for testing while using the remaining areas for training. We utilized a two-layer MLP to project patch features to 96 channels for generating point-wise semantic predictions in the decoder. The patch features were up-sampled using nearest neighbor up-sampling, and the five nearest key points for each target coordinate were concatenated with their distance to the target coordinate. The concatenated features were then projected to 96 channels using a two-layer MLP, and features were aggregated using a weighted sum based on their inverse distance to the target coordinate. Finally, an MLP with a dropout rate of 0.5 was used for classification. To adhere to previous work [9], we voxel downsampled the point clouds with a voxel size of 0.04m and applied the same data augmentation method. For the encoder, we randomly sampled 24K points and divided them into 512 patches with 64 points. We fine-tuned our method for 300 epochs with a learning rate of  $1e-3$  and a batch size of 8.

## 3 Additional Ablation Studies

**Ablation Study on the Distillation Metric.** In the ablation study on the contrastive metric, Table 1 shows that our method achieves the best results with the Smooth  $l_1$  loss, unlike previous methods [2; 10] that utilize InfoNCE[7] for contrastive learning with positive and negative samples. We argue that this is because our method uses a masked autoencoder in the pre-training stage, which masks a large portion of input tokens, leading to small matched pairs for contrastive learning and decreased performance of InfoNCE loss. Furthermore, the foundation models (DINOv2, CLIP) used in our method are trained with contrastive learning and have already learned discriminative representations, making InfoNCE unnecessary for increasing the distance between positive and negative samples in the distillation stage.

**Ablation Study on the Masking Ratio.** In our comprehensive ablation study, we analyzed the influence of various masking ratios on the performance of the Bridge3D model in 3D object detection and semantic segmentation tasks. The results depicted in Table 2 disclose that optimal latent feature

| Mask Ratio | ScanNetV2   |             | S3DIS       |             |
|------------|-------------|-------------|-------------|-------------|
|            | $AP_{25}$   | $AP_{50}$   | $mIoU$      | $mAcc$      |
| 80%        | 65.9        | 44.8        | 70.6        | 76.2        |
| 70%        | <b>66.3</b> | <b>45.5</b> | <b>71.1</b> | <b>77.5</b> |
| 60%        | 65.8        | 45.1        | 71.0        | 77.2        |
| 50%        | 65.1        | 44.5        | 70.5        | 76.7        |

Table 2: Ablation study on masking ratio for 3D object detection and semantic segmentation tasks.

67 extraction is achieved when the masking ratio is set at 70%. Importantly, our experiment also exhibits  
68 the robustness of our proposed methodology, maintaining consistent performance across a range of  
69 masking ratios. This consistency underscores the wide applicability and efficacy of the Bridge3D  
70 framework in learning robust representations of 3D point clouds.

## 71 References

- 72 [1] Iro Armeni, Ozan Sener, Amir R Zamir, Helen Jiang, Ioannis Brilakis, Martin Fischer, and  
73 Silvio Savarese. 3d semantic parsing of large-scale indoor spaces. In *Proceedings of the IEEE  
74 conference on computer vision and pattern recognition*, pages 1534–1543, 2016.
- 75 [2] Runnan Chen, Youquan Liu, Lingdong Kong, Xinge Zhu, Yuexin Ma, Yikang Li, Yuenan Hou,  
76 Yu Qiao, and Wenping Wang. Clip2scene: Towards label-efficient 3d scene understanding by  
77 clip. *arXiv preprint arXiv:2301.04926*, 2023.
- 78 [3] Angela Dai, Angel X Chang, Manolis Savva, Maciej Halber, Thomas Funkhouser, and Matthias  
79 Nießner. Scannet: Richly-annotated 3d reconstructions of indoor scenes. In *Proceedings of the  
80 IEEE conference on computer vision and pattern recognition*, pages 5828–5839, 2017.
- 81 [4] Haoqiang Fan, Hao Su, and Leonidas J Guibas. A point set generation network for 3d object  
82 reconstruction from a single image. In *Proceedings of the IEEE conference on computer vision  
83 and pattern recognition*, pages 605–613, 2017.
- 84 [5] Ze Liu, Zheng Zhang, Yue Cao, Han Hu, and Xin Tong. Group-free 3d object detection via  
85 transformers. In *Proceedings of the IEEE/CVF International Conference on Computer Vision*,  
86 pages 2949–2958, 2021.
- 87 [6] Ishan Misra, Rohit Girdhar, and Armand Joulin. An end-to-end transformer model for 3d object  
88 detection. In *Proceedings of the IEEE/CVF International Conference on Computer Vision*,  
89 pages 2906–2917, 2021.
- 90 [7] Aaron van den Oord, Yazhe Li, and Oriol Vinyals. Representation learning with contrastive  
91 predictive coding. *arXiv preprint arXiv:1807.03748*, 2018.
- 92 [8] Charles R Qi, Hao Su, Kaichun Mo, and Leonidas J Guibas. Pointnet: Deep learning on point  
93 sets for 3d classification and segmentation. In *Proceedings of the IEEE conference on computer  
94 vision and pattern recognition*, pages 652–660, 2017.
- 95 [9] Guocheng Qian, Yuchen Li, Houwen Peng, Jinjie Mai, Hasan Hammoud, Mohamed Elhoseiny,  
96 and Bernard Ghanem. Pointnext: Revisiting pointnet++ with improved training and scaling  
97 strategies. *Advances in Neural Information Processing Systems*, 35:23192–23204, 2022.
- 98 [10] Corentin Sautier, Gilles Puy, Spyros Gidaris, Alexandre Boulch, Andrei Bursuc, and Renaud  
99 Marlet. Image-to-lidar self-supervised distillation for autonomous driving data. In *Proceedings  
100 of the IEEE/CVF Conference on Computer Vision and Pattern Recognition*, pages 9891–9901,  
101 2022.
- 102 [11] Shuran Song, Samuel P Lichtenberg, and Jianxiong Xiao. Sun rgb-d: A rgb-d scene understand-  
103 ing benchmark suite. In *Proceedings of the IEEE conference on computer vision and pattern  
104 recognition*, pages 567–576, 2015.
- 105 [12] Xumin Yu, Lulu Tang, Yongming Rao, Tiejun Huang, Jie Zhou, and Jiwen Lu. Point-bert:  
106 Pre-training 3d point cloud transformers with masked point modeling. In *Proceedings of the  
107 IEEE/CVF Conference on Computer Vision and Pattern Recognition*, pages 19313–19322, 2022.
